# Supplementary material for: Prenatal PM2.5 Exposure in Relation to Maternal and Newborn Telomere Length at Delivery
Source: MDPI journal article supplement (doi:10.3390/toxics10010013), 2022-01-03
Supplement: s1 [file s1]

# Prenatal PM<sub>2.5</sub> Exposure in Relation to Maternal and Newborn Telomere Length at Delivery

Teresa Durham, Jia Guo, Whitney Cowell, Kylie W. Riley, Shuang Wang, Deliang Tang, Frederica Perera and Julie B. Herbstman

**Table S1.** Characteristics of excluded participants (N = 534).

|                                                         | N available | Mean ± SD or N (%)   | p-value from comparisons included participants (N = 193) |
|---------------------------------------------------------|-------------|----------------------|----------------------------------------------------------|
| African American                                        | 534         | 182 (34.1)           | 0.47*                                                    |
| Dominican                                               |             | 352 (65.9)           |                                                          |
| < High school education or equivalent                   | 534         | 214 (40.4)           | 0.56*                                                    |
| Child sex (girl)                                        | 534         | 265 (49.6)           | 0.07*                                                    |
| Season of conception                                    |             |                      |                                                          |
| Spring                                                  | 523         | 127 (24.3)           | 0.05*                                                    |
| Summer                                                  |             | 163 (31.2)           |                                                          |
| Fall                                                    |             | 118 (22.6)           |                                                          |
| Winter                                                  |             | 115 (22.0)           |                                                          |
| Maternal age (years)                                    | 534         | 25.12 ± 4.85         | 0.48**                                                   |
| Gestational age (weeks)                                 | 524         | 39.27 ± 1.42         | 0.29**                                                   |
| Maternal rLTL at delivery                               | 4           | 0.95 ± 0.11          | 0.34**                                                   |
| Umbilical cord rLTL                                     | 31          | 1.17 ± 0.22          | 0.18**                                                   |
| PM <sub>2.5</sub> (µg/m <sup>3</sup> ), median (Q1, Q3) |             |                      |                                                          |
| Total pregnancy                                         | 523         | 17.00 (15.79, 18.72) | 0.01***                                                  |
| First trimester                                         | 506         | 17.39 (15.31, 19.84) | 0.03***                                                  |
| Second trimester                                        | 518         | 16.98 (14.75, 19.16) | 0.13***                                                  |
| Third trimester                                         | 523         | 16.80 (14.93, 18.97) | 0.58***                                                  |

\* chi-square test. \*\* two sample t-test. \*\*\* Wilcoxon rank sum test.
